# Supplementary material
Source: MDPI journal article supplement (https://www.mdpi.com/2673-9992/21/1/40)
Supplement: s1 [file s1]

Supplement

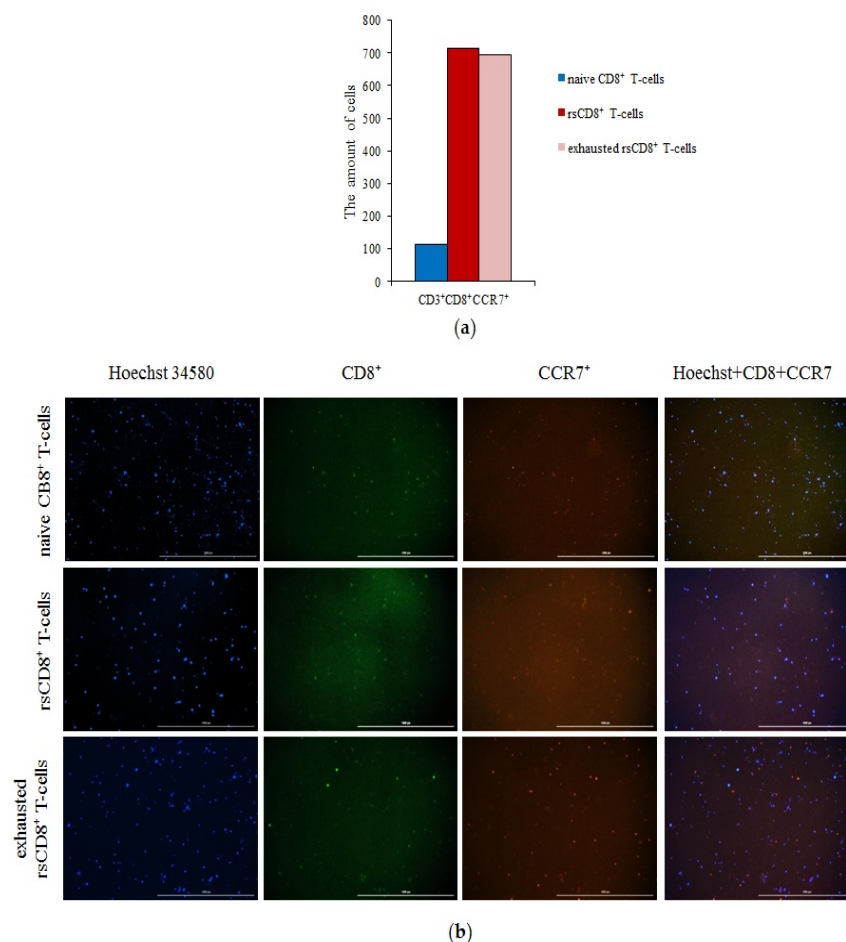

**Figure S1.** The count of CCR7<sup>+</sup> CD3<sup>+</sup>CD8<sup>+</sup>T-cells in a culture of naive, reprogrammed, exhausted reprogrammed CD8<sup>+</sup> T-cells isolated from the spleen. (a) The count of naive, reprogrammed, and exhausted reprogrammed CD8<sup>+</sup> T-cells of the spleen of C57BL/6 mice expressing the CCR7 marker in T-cell culture; (b) 20× images of T-cells stained with: Hoechst (blue) to identify cell nuclei; CD8 FITC (green); CCR7 AF555 (red); (Hoechst+CD8+ CCR7) composite image using all three colors. Determination of the percentage of cells CD3<sup>+</sup>CD8<sup>+</sup>CCR7<sup>+</sup> was made by assessing the ratio of cells counted in green and red channel to total cells counted in the blue (DAPI) channel. All scale bars are 1000 µm. \*—for comparison with the naive spleen T-cells by Mann–Whitney test ( $p < 0.05$ ).

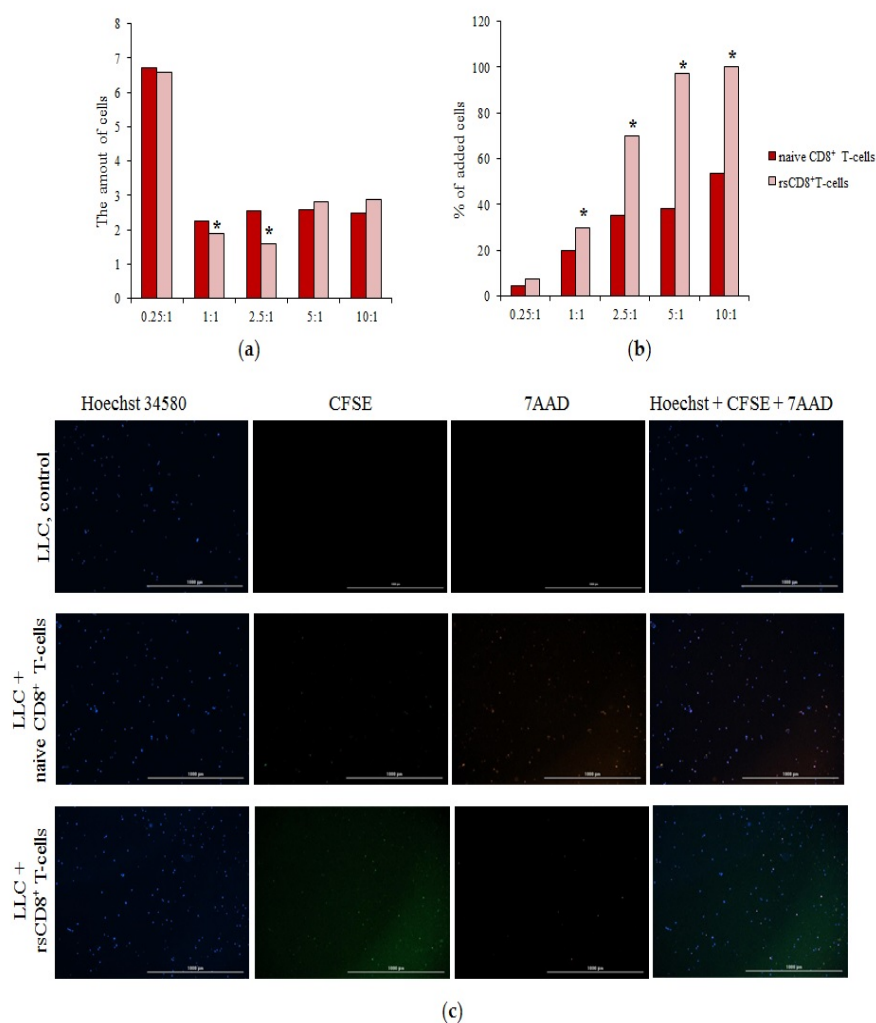

**Figure S2.** Cytotoxicity and apoptosis of naive and reprogrammed spleen CD8<sup>+</sup> T-cells in LLC culture. **(a)** The count of apoptotic tumor LLC cells after co-cultivation with reprogrammed spleen CD8<sup>+</sup> T-cells (% from dead cells of LLC culture); **(b)** The count of apoptotic tumor LLC cells after cocultivation with spleen CD8<sup>+</sup> T-cells (% from added cells); **(c)** Hoechst (blue) to identify cell nuclei; 7AAD (red); (Hoechst+7AAD+) composite image using all two colors. Determination of the percent of died cells of LLC Hoechst+7AAD+ was made by assessing the ratio of cells counted in blue and red channel to total cells of LLC without green channel. All scale bars are 1000 μm. \* - for comparison with naive CD8<sup>+</sup> T-cell by Mann–Whitney test ( $p < 0.05$ ).

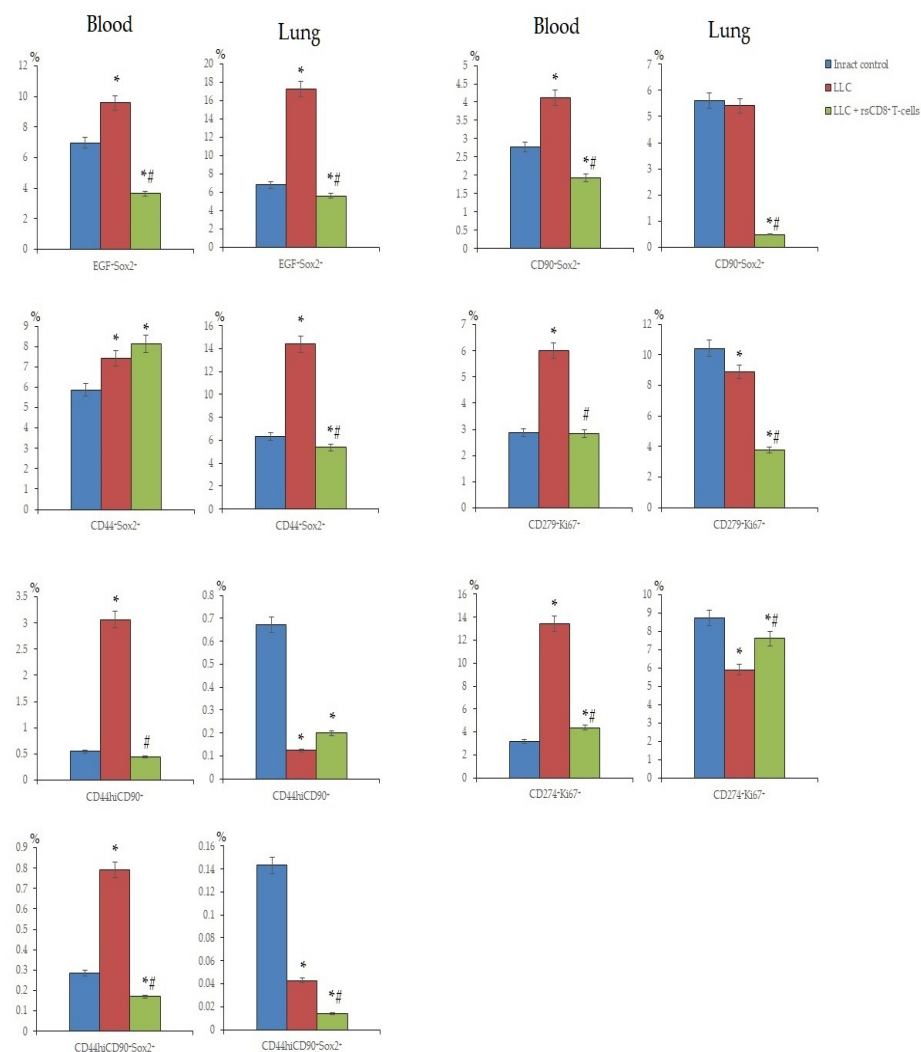

**Figure S3.** The count of cancer cells and cancer stem cells in the blood and lung of mice with LLC on d7 (% of total mononuclear cells number). The phenotype of cancer cells and cancer stem cells: EGF<sup>+</sup>Sox2<sup>+</sup>, CD44<sup>+</sup>Sox2<sup>+</sup>, CD44<sup>hi</sup>CD90<sup>+</sup>, CD44<sup>hi</sup>CD90<sup>+</sup>Sox2<sup>+</sup>, CD90<sup>+</sup>Sox2<sup>+</sup>, CD279<sup>+</sup>Ki67<sup>+</sup>, CD274<sup>+</sup>Ki67<sup>+</sup>. \*—for comparison with the intact group by Mann–Whitney test ( $p < 0.05$ ); #—for comparison with the mice with LLC by Mann–Whitney test ( $p < 0.05$ ).

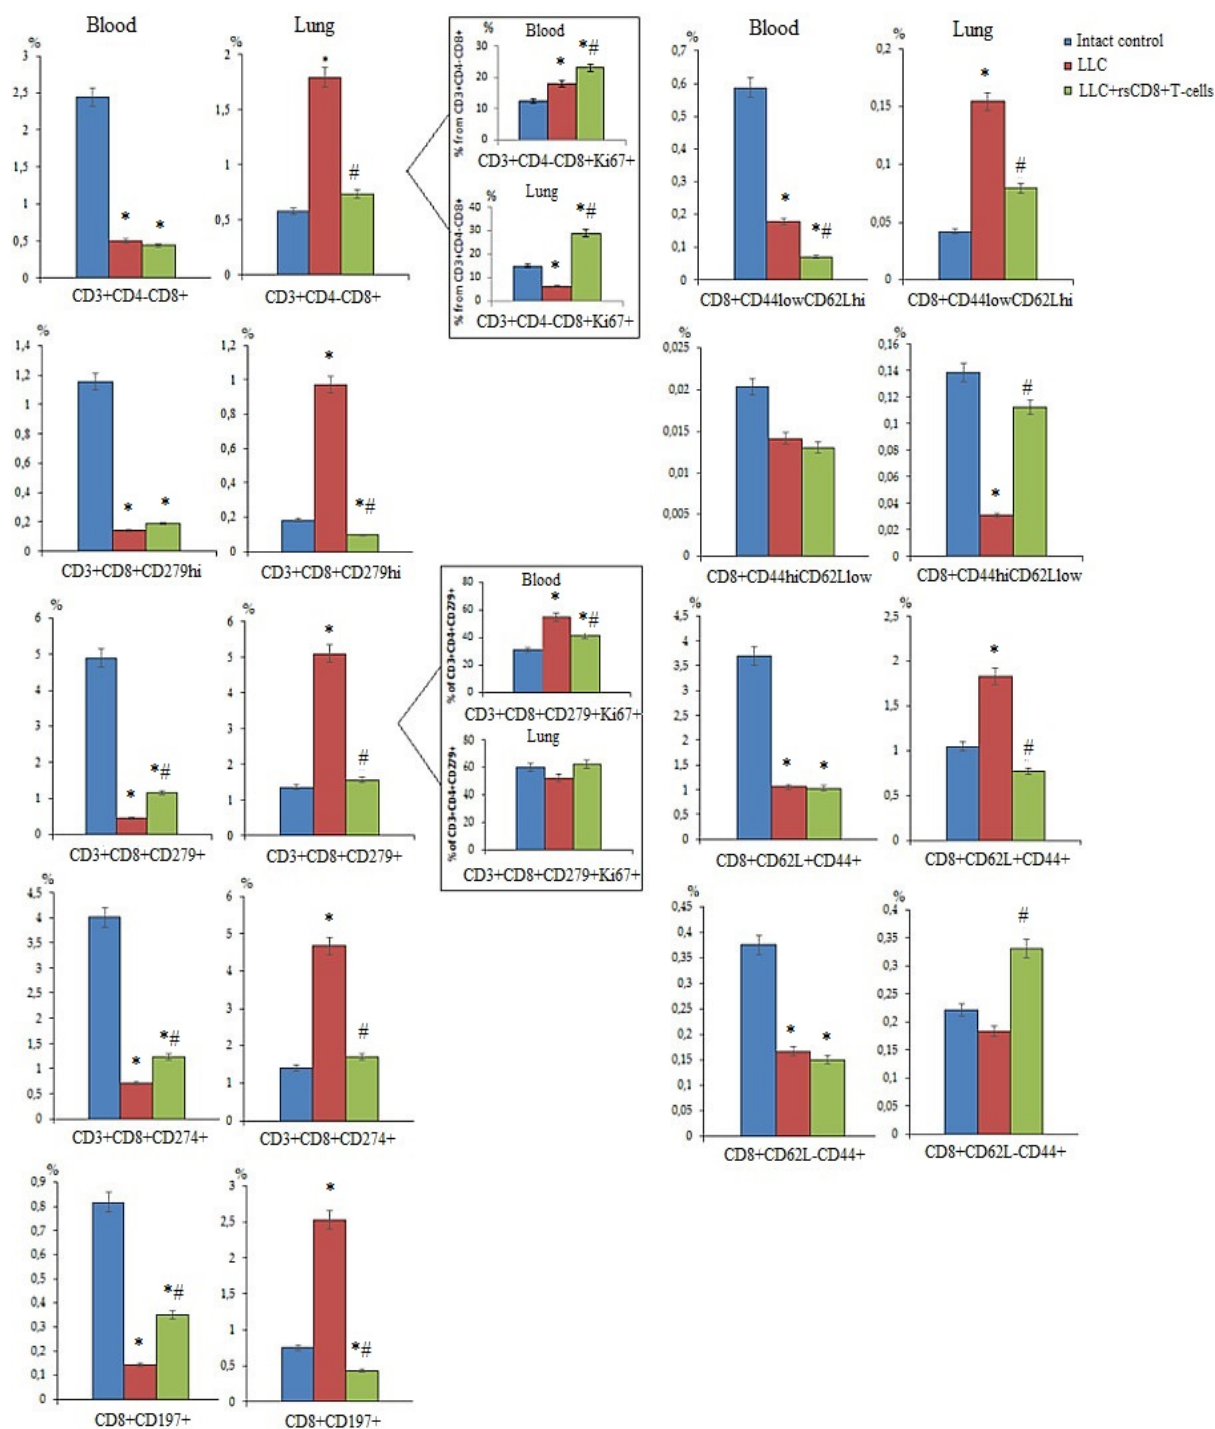

**Figure S4.** The effect of rsCD8<sup>+</sup> T-cell-therapy on CD8<sup>+</sup> T-cell count in blood and lung of mice with LLC on d7 (% of total mononuclear cells number). Phenotype of CD8 cells: CD3<sup>+</sup>CD4<sup>-</sup>CD8<sup>+</sup>, CD3<sup>+</sup>CD8<sup>+</sup>PD-1<sup>+</sup>, CD3<sup>+</sup>CD8<sup>+</sup>PD-L1<sup>+</sup>, CD3<sup>+</sup>CD8<sup>+</sup>PD-1<sup>hi</sup>, CD8<sup>+</sup>CD197<sup>+</sup>, CD8<sup>+</sup>CD62L-CD44<sup>+</sup>, CD8<sup>+</sup>CD62L<sup>hi</sup>CD44<sup>low</sup>, CD8<sup>+</sup>CD62L<sup>hi</sup>CD44<sup>low</sup>, CD3<sup>+</sup>CD4<sup>-</sup>CD8<sup>+</sup>Ki67<sup>+</sup> and CD3<sup>+</sup>CD8<sup>+</sup>PD-1<sup>hi</sup>Ki67<sup>+</sup>. \*—for comparison with the intact group by Mann–Whitney test ( $p < 0.05$ ); #—for comparison with the mice with LLC by Mann–Whitney test ( $p < 0.05$ ).

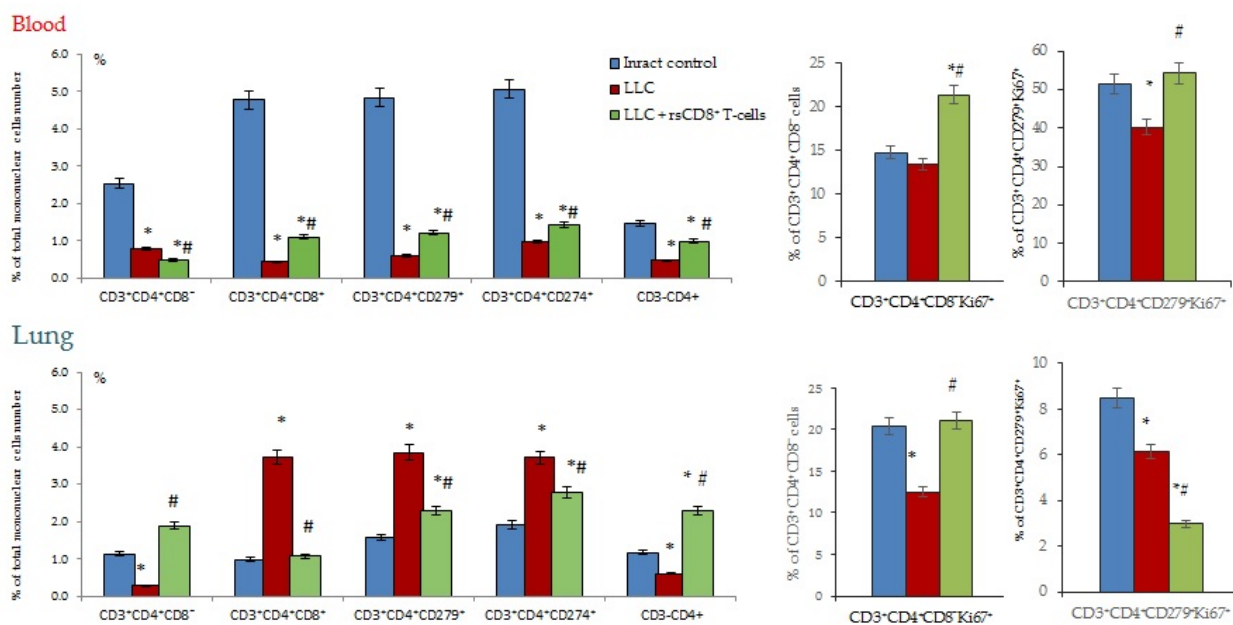

**Figure S5.** The effect of rsCD8<sup>+</sup> T-cell-therapy on CD4<sup>+</sup> T-cell count in blood and lung of mice with LLC on d7 (% of total mononuclear cell number). Phenotype of CD4<sup>+</sup> T-cells: CD3<sup>+</sup>CD4<sup>+</sup>, CD3<sup>+</sup>CD4<sup>+</sup>CD8<sup>+</sup>, CD3<sup>+</sup>CD4<sup>+</sup>PD-L1<sup>+</sup>, CD3<sup>+</sup>CD4<sup>+</sup>PD-1<sup>+</sup>, CD3<sup>+</sup>CD4<sup>+</sup>CD8<sup>+</sup>, CD3<sup>+</sup>CD4<sup>+</sup>PD-1<sup>+</sup>Ki67<sup>+</sup> and CD3<sup>+</sup>CD4<sup>+</sup>CD8<sup>+</sup>Ki67<sup>+</sup>. \*—for comparison with the intact group by Mann–Whitney test ( $p < 0.05$ ); #—for comparison with the mice with LLC by Mann–Whitney test ( $p < 0.05$ ).
