# Supplementary material
Source: MDPI journal article supplement (https://www.mdpi.com/2673-9992/21/1/40)
Supplement: s1 [file s1]

Archive with 1 entries (1 files):
- msf-2456380-Supplementary.pdf
